# Supplementary material for: The bacterial community composition of American lobster (Homarus americanus) embryos and recently hatched larvae held under different temperature and acidification conditions
Source: Research Square preprint supplement (doi:10.21203/rs.3.rs-6831519/v1), 2025-10-07
Supplement: Supplementary file 2 [file 40998e0f135d6008124c999d.docx]

*Supplemental Table 1: Number of reads from each sample after trimming, filtering, denoising, and removing chimeras.*

|  | **input** | **filtered** | **denoisedF** | **denoisedR** | **merged** | **nonchim** |
| --- | --- | --- | --- | --- | --- | --- |
| **Embryos:** |  |  |  |  |  |  |
| **T11L1E1** | 326320 | 315653 | 314739 | 314511 | 309878 | 302055 |
| **T11L2E1** | 210638 | 204561 | 203050 | 202820 | 195848 | 182492 |
| **T3L1E2** | 485574 | 469559 | 468785 | 468261 | 463492 | 452715 |
| **T3L2E1** | 284168 | 276491 | 275844 | 275515 | 271820 | 267495 |
| **T3L2E2** | 206596 | 203288 | 203079 | 203006 | 202125 | 201241 |
| **T4L1E1** | 348443 | 336967 | 335562 | 335466 | 327568 | 312521 |
| **T4L2E1** | 206923 | 202425 | 202236 | 202070 | 201413 | 200946 |
| **T4L2E2** | 381175 | 366538 | 365412 | 365142 | 359897 | 345153 |
| **T5L1E1** | 383930 | 370923 | 368643 | 368550 | 355669 | 330441 |
| **T5L1E2** | 823749 | 800031 | 798616 | 797696 | 787268 | 760122 |
| **T5L2E1** | 373899 | 363593 | 361063 | 361241 | 346915 | 302003 |
| **T5L2E2** | 360618 | 351247 | 350525 | 350168 | 346300 | 337478 |
| **T6L1E1** | 415113 | 402899 | 400713 | 400329 | 388142 | 361775 |
| **T6L1E2** | 389598 | 380272 | 379647 | 379339 | 376676 | 367236 |
| **T6L1E3** | 294129 | 284831 | 283916 | 283571 | 278619 | 272479 |
| **T6L1E4** | 152876 | 147639 | 147306 | 147028 | 145452 | 144986 |
| **T6L1E5** | 237515 | 225753 | 225396 | 224972 | 222784 | 221920 |
| **T6L1E6** | 267093 | 260024 | 259650 | 259333 | 257087 | 255848 |
| **T6L2E2** | 358966 | 348492 | 347936 | 347797 | 345514 | 343057 |
| **T7L1E1** | 250059 | 242391 | 242093 | 241826 | 240033 | 238269 |
| **T7L1E2** | 496491 | 483337 | 480905 | 481138 | 467461 | 414900 |
| **T7L1E3** | 300362 | 286081 | 285761 | 285035 | 282428 | 280914 |
| **T7L1E4** | 304997 | 290928 | 290440 | 290037 | 287658 | 286829 |
| **T7L1E5** | 371058 | 357938 | 356778 | 356145 | 350124 | 343455 |
| **T7L1E6** | 221100 | 213374 | 213023 | 212788 | 210499 | 209744 |
| **T7L2E1** | 370298 | 360070 | 358995 | 358741 | 352237 | 339281 |
| **T7L2E2** | 351594 | 338304 | 337750 | 337283 | 332301 | 330395 |
| **T8L1E1** | 282175 | 272149 | 270006 | 269883 | 258382 | 240399 |
| **T8L1E2** | 412297 | 399316 | 398442 | 398239 | 394305 | 384378 |
| **T8L2E1** | 263349 | 254433 | 253743 | 253262 | 248675 | 245073 |
| **T8L2E2** | 371801 | 363392 | 362766 | 362716 | 360175 | 352639 |
| **Larvae:** |  |  |  |  |  |  |
| **T11L1L** | 12145 | 11763 | 11693 | 11687 | 11373 | 10669 |
| **T3L2L** | 18270 | 17352 | 17315 | 17311 | 17099 | 16893 |
| **T5L1L** | 6980 | 6645 | 6606 | 6612 | 6538 | 6535 |
| **T5L2L** | 80653 | 78800 | 78437 | 78275 | 75655 | 72356 |
| **T7L1L** | 14163 | 13651 | 13621 | 13599 | 13401 | 13371 |
| **T8L1L** | 10872 | 9999 | 9960 | 9935 | 9819 | 9819 |
| **T8L2L** | 87975 | 84904 | 84536 | 84326 | 81741 | 79037 |
| **Tank water:** |  |  |  |  |  |  |
| **T1** | 148663 | 145443 | 142934 | 143240 | 127078 | 101511 |
| **T11** | 149637 | 146714 | 145065 | 145309 | 134320 | 103604 |
| **T2** | 140686 | 137054 | 135158 | 135269 | 123717 | 102963 |
| **T3** | 126637 | 124478 | 123408 | 123293 | 117099 | 106860 |
