# Supplementary material for: The bacterial community composition of American lobster (Homarus americanus) embryos and recently hatched larvae held under different temperature and acidification conditions
Source: Research Square preprint supplement (doi:10.21203/rs.3.rs-6831519/v1), 2025-10-07
Supplement: Supplementary file 3 [file e9fb1e48cf8e3b13d8b69709.docx]

Supplemental Table 2: Non-rarefied observed richness, Shannon-Wiener index, Simpson index, and Inverse Simpson index are shown with standard errors. Statistical analyses were performed between early vs. late embryos, and larvae vs. tank water for each alpha-diversity metric. Differences were assessed using the Kruskal-Wallis test.

| Sample Type | Observed | Shannon | Simpson | Inverse Simpson |
| --- | --- | --- | --- | --- |
| Early Embryo | 329.64 ± 26.58 | 2.47 ± 0.10* | 0.83 ± 0.01* | 6.52 ± 0.59* |
| Late Embryo | 411.42 ± 38.11 | 3.69 ± 0.17* | 0.91 ± 0.02* | 17.16 ± 3.44* |
| Larvae | 221.71 ± 71.38 | 4.00 ± 0.21** | 0.95 ± 0.01** | 28.14 ± 7.07** |
| Tank | 325.50 ± 29.60 | 2.96 ± 0.25** | 0.87 ± 0.04** | 9.30 ± 2.39** |

*Early vs. late p<0.05.

**Larvae vs. tank p<0.05.

Supplemental Table 3: Rarefied observed richness, Shannon-Wiener index, and Simpson index are shown. Estimators are essentially the same as non-rarefied estimators.

| **Sample Type** | **ASVs/sample** | **Shannon Index** | **Simpson Index** |  |
| --- | --- | --- | --- | --- |
| Early Embryo | 204.91 | 2.71 | 0.83 |  |
| Late Embryo | 283.67 | 3.65 | 0.91 |  |
| Larvae | 201.14 | 3.99 | 0.95 |  |
| Tank | 200.5 | 2.95 | 0.87 |  |
